# Supplementary material for: A microtensiometer capable of measuring water potentials below −10 MPa
Source: Royal Society of Chemistry journal article supplement (doi:10.1039/c4lc00342j), 2014-01-01
Supplement: c4lc00342j2.pdf [file c4lc00342j2.pdf]

### Supplemental Section 1 – Microtensimeter Fabrication Process Flow

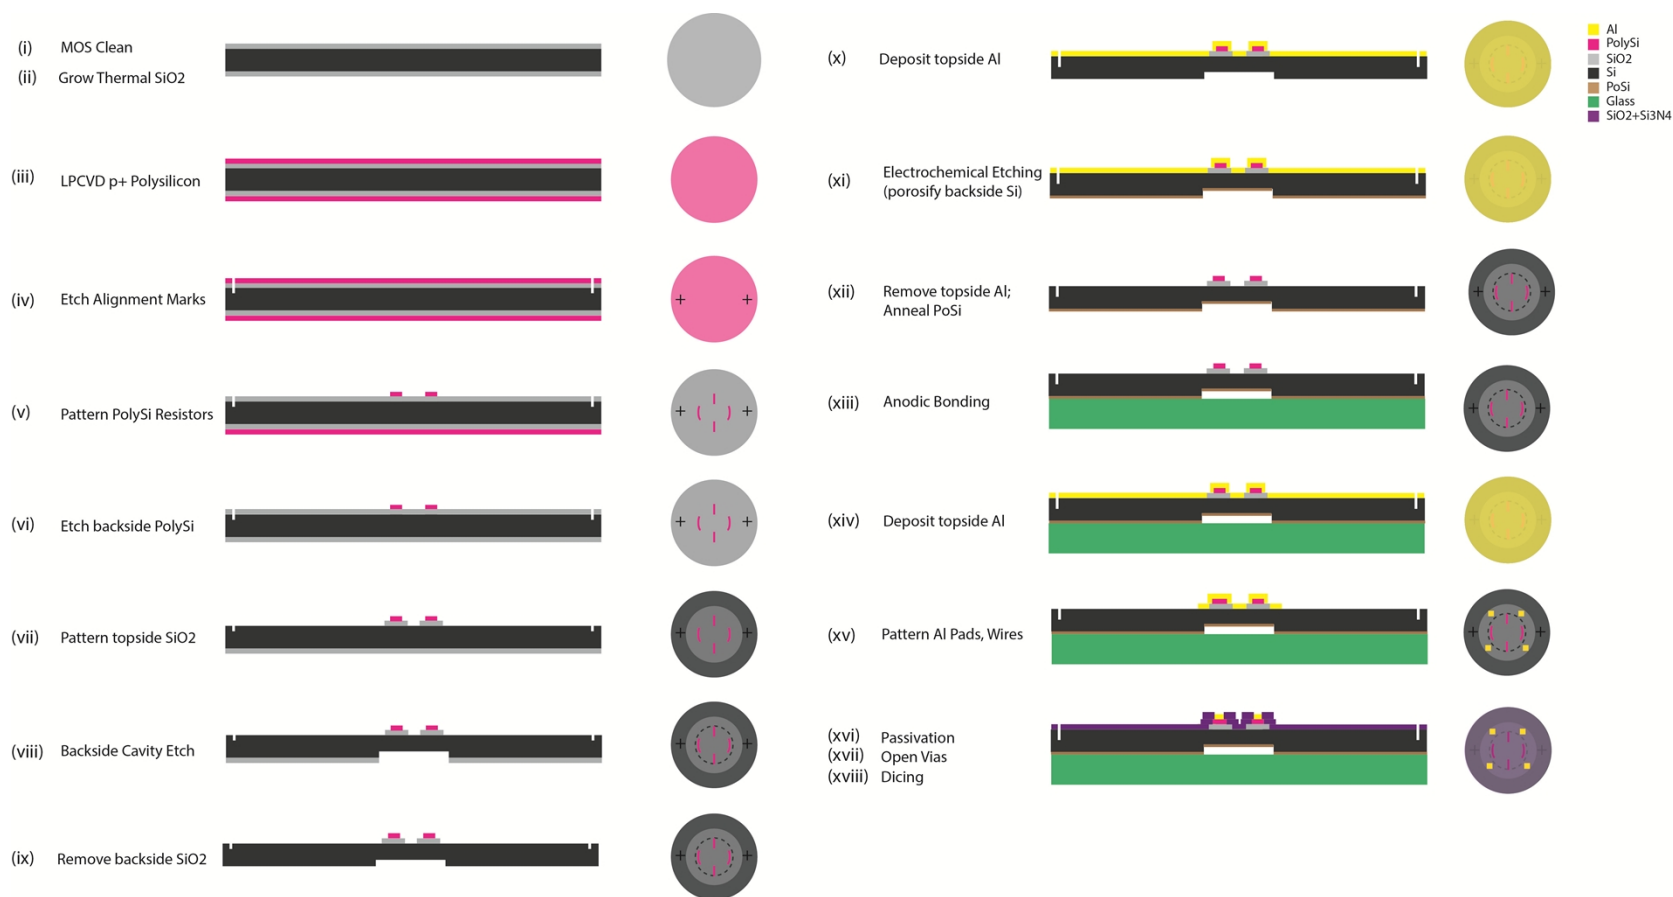

**Fig. S1** Microtensimeter fabrication process flow (full). Wafer cross-sectional view (left side), top view (right side).
