# Supplementary material for: A microtensiometer capable of measuring water potentials below −10 MPa
Source: Royal Society of Chemistry journal article supplement (doi:10.1039/c4lc00342j), 2014-01-01
Supplement: c4lc00342j3.pdf [file c4lc00342j3.pdf]

### Supplemental Section 2 – List of Photolithographic Masks

| Mask Name               | Side of Wafer | Description                                                                          |
|-------------------------|---------------|--------------------------------------------------------------------------------------|
| Mask1-Alignment         | Top           | Wafer front-side alignment marks used to align all subsequent mask layers.           |
| Mask1-Alignment_Closeup | Top           | Detail of alignment marks on one side of wafer.                                      |
| Mask2-Oxide             | Top           | Thermally-grown silicon dioxide pattern for electrical isolation.                    |
| Mask3-Resistor          | Top           | Pattern for the polysilicon piezoresistors on the front-side of the wafer.           |
| Mask4-Cavity            | Back          | Pattern on back-side to form both the cavity (to fill with water) and the diaphragm. |
| Mask5-Metal             | Top           | Metal wires connecting the piezoresistors with the contact pads.                     |
| Mask6-Vias              | Top           | Pattern to open holes (vias) over the metal pads through the passivation layers.     |
